# Supplementary material
Source: PubMed Central journal article supplement (PMC7211135)
Supplement: NIHMS1059869-supplement-Supplement.pdf [file NIHMS1059869-supplement-Supplement.pdf]

## Supplemental Data

### “COPD-dependent effects of genetic variation in key inflammation pathway genes on lung cancer risk”

Donovan Watzka, Christine M. Lusk, Gregory Dyson, Kristen S. Purrington, Angela S. Wenzlaff, Christine Neslund-Dudas, Ayman O. Soubani, Shirish M. Gadgeel, and Ann G. Schwartz

## Table of Contents

**Supplemental Table 1.** Immune system pathways utilized for genetic analysis of COPD-dependent lung cancer risk. Pathways and associated genes were annotated using the Reactome database.

**Supplemental Table 2.** Comparison of lung cancer cases in test set with cases in validation set; samples were stratified by case-control status and randomly assigned to either test (2/3 of the total) or validation (1/3 of the total) sample.

**Supplemental Table 3.** Comparison of controls in test set with controls in validation set; samples were stratified by case-control status and randomly assigned to either test (2/3 of the total) or validation (1/3 of the total) sample.

**Supplemental Figure 1.** African Ancestry and principal component analysis for population stratification

**Supplemental Figure 2.** Manhattan plot of the discovery sample with COPD

**Supplemental Figure 3.** Manhattan plot of the discovery sample without COPD

**Supplemental Figure 4.** Protein-protein interaction plots of the significant lung cancer risk candidates between COPD strata.

**Supplemental Table 4.** Validated SNP-lung cancer associations among 1,123 lung cancer cases and controls with COPD

**Supplemental Table 5.** Validated SNP-lung cancer associations among 1,762 lung cancer cases and controls without COPD

**Supplemental Table 6.** Histology-specific effects of validated, consistent context dependent SNPs in cases and controls with COPD.

**Supplemental Table 7.** Histology-specific effects of validated, consistent context dependent SNPs in cases and controls without COPD.

**Supplemental Table 1.** Immune system pathways utilized for genetic analysis of COPD-dependent lung cancer risk. Pathways and associated genes were annotated using the Reactome database.

| Pathway                           | Sub-Pathway                                | # Genes | # SNPs |
|-----------------------------------|--------------------------------------------|---------|--------|
| Adaptive Immunity                 |                                            | 824     | 39227  |
|                                   | B-cell Receptor Signaling                  | 233     | 13206  |
|                                   | T-cell Receptor Signaling                  | 118     | 4118   |
|                                   | Costimulatory CD28 Family                  | 69      | 2908   |
|                                   | Immunoregulatory Interactions              | 127     | 4710   |
|                                   | RAP1 Signaling                             | 16      | 1589   |
|                                   | MHC Class I Family                         | 368     | 14787  |
|                                   | MHC Class II Family                        | 121     | 5133   |
| Innate Immunity                   |                                            | 790     | 43609  |
|                                   | Advanced Glycosylation Receptor Signaling  | 13      | 621    |
|                                   | Complement Cascade                         | 84      | 4188   |
|                                   | C-type Lectin Receptors                    | 124     | 4985   |
|                                   | Cytosolic Sensors of Pathogen DNA          | 67      | 2782   |
|                                   | DAP12 Interactions                         | 376     | 24844  |
|                                   | Defensins                                  | 52      | 673    |
|                                   | Fc-epsilon Receptor Signaling              | 377     | 23564  |
|                                   | Fc-gamma Receptor Signaling                | 85      | 6496   |
|                                   | NOD-Like Receptor Signaling                | 51      | 2173   |
|                                   | RIG1-MDA5 Induction of IFN-alpha/beta      | 81      | 2728   |
|                                   | Innate Pathogen Detection                  | 38      | 1632   |
|                                   | Toll-Like Receptor Cascades                | 151     | 7022   |
| Cytokine Signaling                |                                            | 818     | 38457  |
|                                   | Interferon Signaling                       | 202     | 8071   |
|                                   | Interleukin Signaling                      | 430     | 23391  |
|                                   | Growth Hormone Signaling                   | 24      | 1071   |
|                                   | Prolactin Signaling                        | 15      | 650    |
|                                   | TNFR2-NFKB Signaling                       | 97      | 2528   |
| Programmed Cell Death             |                                            | 203     | 9173   |
|                                   | Apoptosis                                  | 166     | 7555   |
|                                   | Apoptosis Signaling                        | 67      | 2819   |
|                                   | Death Receptor Signaling                   | 51      | 2049   |
|                                   | Regulated Necrosis                         | 21      | 599    |
| Reactive Oxygen/Nitrogen Species  |                                            | 52      | 1966   |
|                                   | ROS Granules                               | 20      | 704    |
|                                   | ROS/RNS Generation                         | 34      | 1331   |
| Immune Signaling                  |                                            | 467     | 24782  |
|                                   | Calcium Signaling                          | 14      | 1354   |
|                                   | G-protein Coupled Receptor Signaling       | 41      | 4334   |
|                                   | Eicosanoid Signaling                       | 35      | 1554   |
|                                   | Glucocorticoid Receptor/Peroxisome         |         |        |
|                                   | Proliferator-Activated Receptor Signaling  | 18      | 955    |
|                                   | Leukocyte Signaling                        | 111     | 5051   |
|                                   | Mitogen-Activated Protein Kinase Signaling | 115     | 6404   |
|                                   | Natural Killer Cell Signaling              | 31      | 1075   |
|                                   | NF-KB Signaling                            | 33      | 1327   |
|                                   | PI3K/AKT Signaling                         | 35      | 1710   |
|                                   | TNF Family Signaling                       | 35      | 1034   |
| Adhesion/Extravasation/Migration  |                                            | 135     | 5313   |
| Phagocytosis-Antigen Presentation |                                            | 39      | 1299   |

**Supplemental Table 2.** Comparison of lung cancer cases in test set with cases in validation set; samples were stratified by case-control status and randomly assigned to either test (2/3 of the total) or validation (1/3 of the total) sample.

| Variable                                | Discovery<br>(n=1008) | Validation<br>(n=498) | Test of<br>homogeneity |
|-----------------------------------------|-----------------------|-----------------------|------------------------|
| Gender (n, %)                           |                       |                       |                        |
| Male                                    | 455 (45.1)            | 223 (44.8)            | 0.895                  |
| Female                                  | 553 (54.9)            | 275 (55.2)            |                        |
| Race (n, %)                             |                       |                       |                        |
| White                                   | 661 (65.6)            | 319 (64.1)            | 0.561                  |
| African American                        | 347 (34.4)            | 179 (35.9)            |                        |
| Age (mean, SD)                          | 63.4 (10.5)           | 63.3 (10.2)           | 0.812                  |
| Smoking status (n, %)                   |                       |                       |                        |
| Never                                   | 88 (8.7)              | 50 (10.0)             | 0.407                  |
| Ever                                    | 920 (91.3)            | 448 (90.0)            |                        |
| Pack years (smokers only) (mean, SD)    | 46.0 (29.8)           | 45.1 (30.7)           | 0.641                  |
| Family history of lung cancer           |                       |                       |                        |
| No                                      | 770 (76.5)            | 385 (77.3)            | 0.715                  |
| Yes                                     | 237 (23.5)            | 113 (22.7)            |                        |
| Missing                                 | 1                     | 0                     |                        |
| History of COPD                         |                       |                       |                        |
| No                                      | 674 (69.4)            | 341 (71.0)            | 0.524                  |
| Yes                                     | 297 (30.6)            | 139 (29.0)            |                        |
| Missing                                 | 37                    | 18                    |                        |
| GOLD COPD (FEV <sub>1</sub> /FVC < 70%) |                       |                       |                        |
| No                                      | 365 (49.3)            | 170 (47.0)            | 0.474                  |
| Yes                                     | 376 (50.7)            | 192 (53.0)            |                        |
| Missing                                 | 267                   | 96                    |                        |
| Histology                               |                       |                       |                        |
| Adenocarcinoma                          | 574 (57.7)            | 266 (54.1)            | 0.183                  |
| Squamous cell                           | 208 (20.9)            | 104 (21.1)            |                        |
| Small cell                              | 127 (12.8)            | 83 (16.9)             |                        |
| other NSCLC                             | 85 (8.6)              | 39 (7.9)              |                        |
| unknown/missing                         | 14                    | 6                     |                        |
| Stage                                   |                       |                       |                        |
| I                                       | 194 (19.6)            | 88 (18.0)             | 0.261                  |
| II                                      | 99 (10.0)             | 38 (7.8)              |                        |
| III                                     | 229 (23.1)            | 108 (22.0)            |                        |
| IV                                      | 469 (47.3)            | 256 (52.2)            |                        |
| Missing                                 | 17                    | 8                     |                        |

**Supplemental Table 3.** Comparison of controls in test set with controls in validation set; samples were stratified by case-control status and randomly assigned to either test (2/3 of the total) or validation (1/3 of the total) sample.

| Variable                                | Test (n=924) | Validation (n=455) | Test of homogeneity |
|-----------------------------------------|--------------|--------------------|---------------------|
| Gender (n, %)                           |              |                    |                     |
| Male                                    | 415 (44.9)   | 214 (47.0)         | 0.458               |
| Female                                  | 509 (55.1)   | 241 (53.0)         |                     |
| Race (n, %)                             |              |                    |                     |
| White                                   | 544 (58.9)   | 269 (59.1)         | 0.930               |
| African American                        | 380 (41.1)   | 186 (40.9)         |                     |
| Age (mean, SD)                          | 60.4 (9.5)   | 60.4 (9.5)         | 0.957               |
| Smoking status (n, %)                   |              |                    |                     |
| Never                                   | 87 (9.4)     | 49 (10.8)          | 0.428               |
| Ever                                    | 837 (90.6)   | 406 (89.2)         |                     |
| Pack years (smokers only) (mean, SD)    | 33.0 (25.2)  | 31.7 (22.6)        | 0.348               |
| Family history of lung cancer           |              |                    |                     |
| No                                      | 774 (83.9)   | 374 (82.2)         | 0.437               |
| Yes                                     | 149 (16.1)   | 81 (17.8)          |                     |
| Missing                                 | 1            | 0                  |                     |
| History of COPD                         |              |                    |                     |
| No                                      | 738 (80.0)   | 356 (78.2)         | 0.459               |
| Yes                                     | 185 (20.0)   | 99 (21.8)          |                     |
| Missing                                 | 1            | 0                  |                     |
| GOLD COPD (FEV <sub>1</sub> /FVC < 70%) |              |                    |                     |
| No                                      | 615 (66.6)   | 317 (69.8)         | 0.223               |
| Yes                                     | 309 (33.4)   | 137 (30.2)         |                     |
| Missing                                 | 0            | 1                  |                     |

**Supplemental Figure 1:** African Ancestry and principal component analysis for population stratification

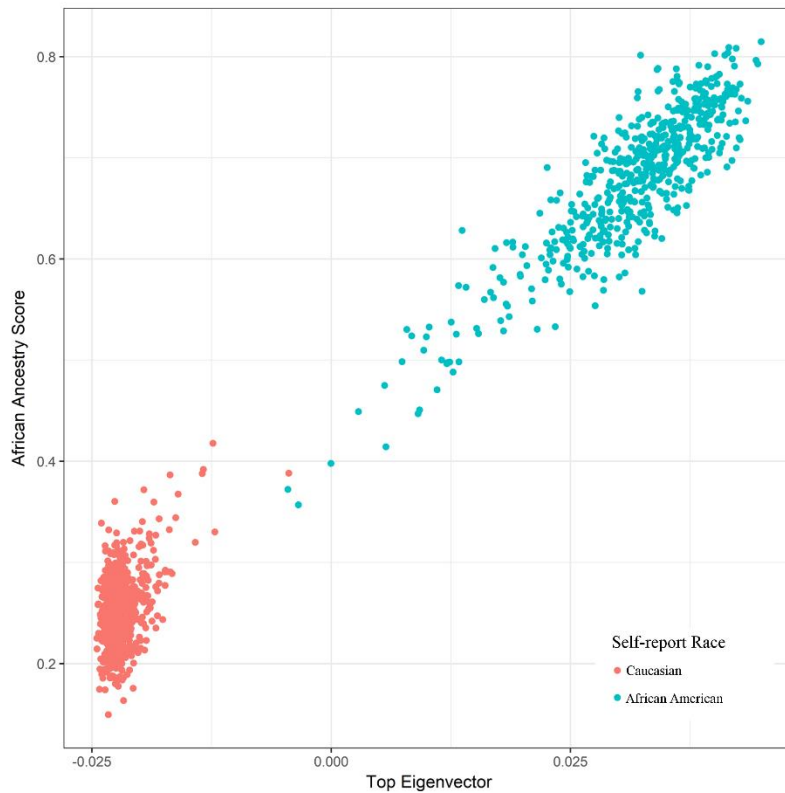

**Legend:** Comparison of the African ancestry score and top eigenvector for participants in the control group (n=1379). Dichotomous self-reported race is depicted in red (Caucasian) and blue (African American). EIGENSTRAT was used to conduct the principal component analysis. The top eigenvector explained ~74% of variance explained by significant eigenvectors (n=19). African ancestry score and the top eigenvector were highly correlated (Spearman correlation: 0.832,  $p=1\times 10^{-16}$ ).

**Supplemental Figure 2:** Manhattan plot of the discovery sample with COPD

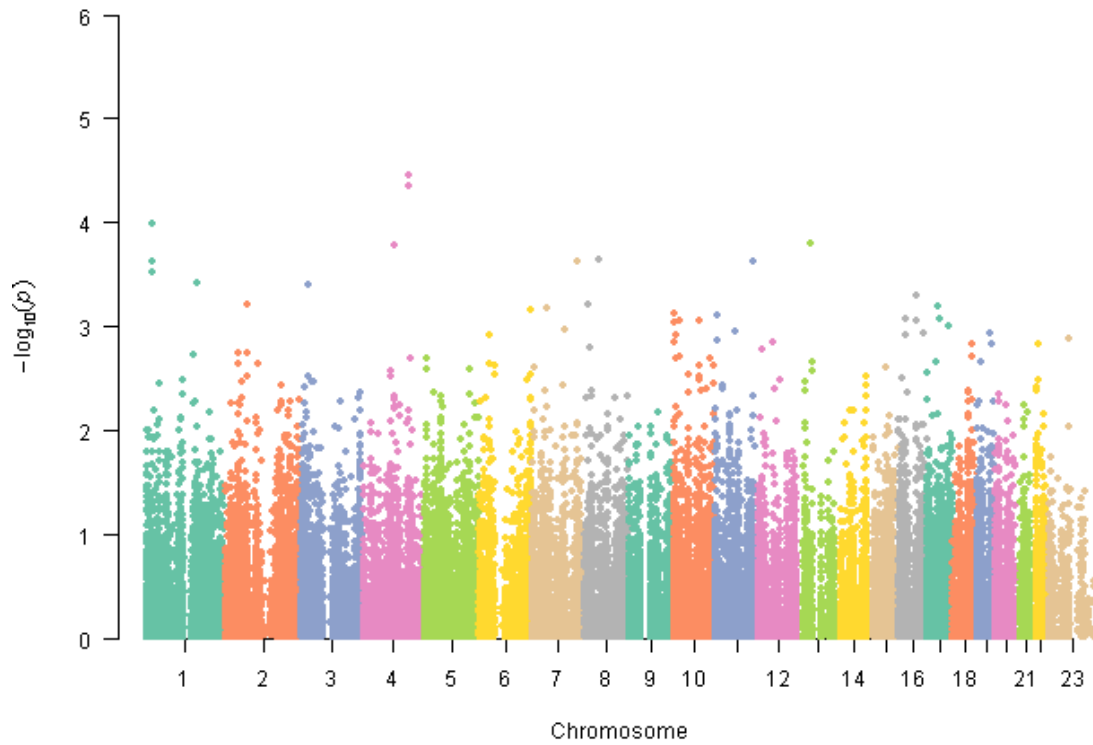

**Legend:** Manhattan plot of  $-\log_{10}(p\text{-value})$  from 43,953 individual immune pathway SNP association test results with lung cancer risk among 760 discovery samples **with** COPD. SNPs were modeled additively, and effect estimates were adjusted for age, African ancestry score, gender and pack years.

**Supplemental Figure 3:** Manhattan plot of the discovery sample without COPD

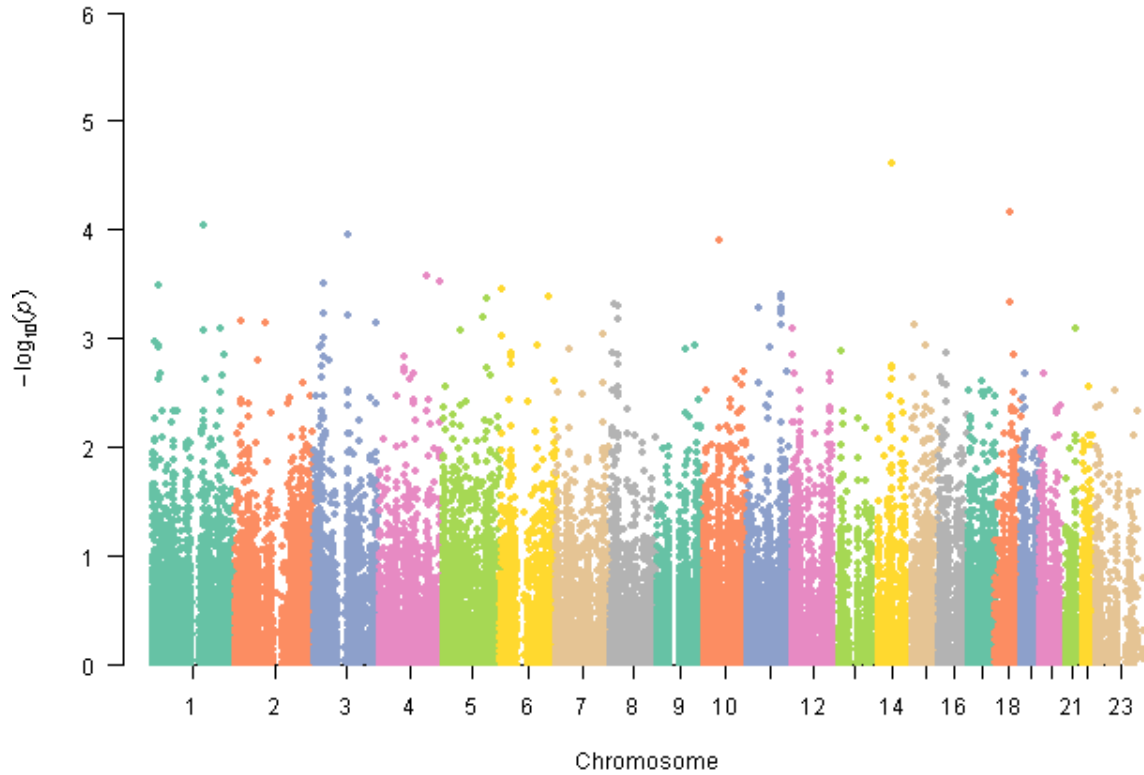

**Legend:** Manhattan plot of  $-\log_{10}(p\text{-value})$  from 43,953 individual immune pathway SNP association test results with lung cancer risk among 1172 discovery samples **without** COPD. SNPs were modeled additively, and effect estimates were adjusted for age, African ancestry score, gender and pack years.

**Supplemental Figure 4.** Protein-protein interaction plots of the significant lung cancer risk candidates between COPD stratum.

**A.**

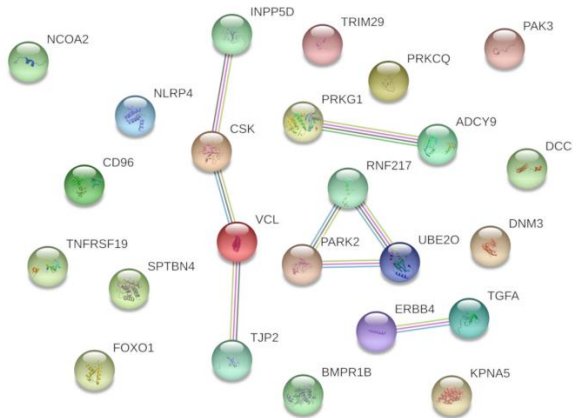

**B.**

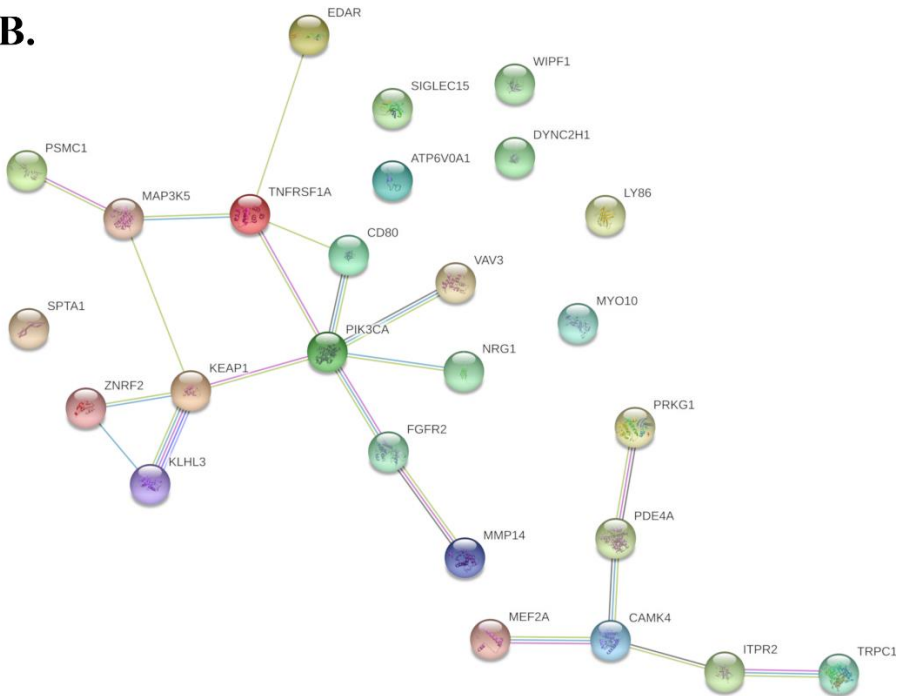

**Legend:** Protein-Protein Interaction plots of the significant gene candidates identified from the validated lung cancer risk model and COPD interaction model. Interaction data were derived from the STRING database and is based upon distinct levels of molecular evidence supporting illustrated protein associations. (A) Candidates identified in individuals with COPD. (B) Candidates identified in individuals without COPD.



**Supplemental Table 4.** Validated SNP-lung cancer associations among 1,123 lung cancer cases and controls with COPD

| Name             | Gene     | CHR | Position  | Discovery Sample  |         | Validation Sample   |         |
|------------------|----------|-----|-----------|-------------------|---------|---------------------|---------|
|                  |          |     |           | OR* (95% CI)      | p value | OR* (95% CI)        | p value |
| rs2932538        | MOV10    | 1   | 113216543 | 0.77 (0.59,1)     | 0.0489  | 0.64 (0.44,0.94)    | 0.0218  |
| rs2901600        | DNM3     | 1   | 171835654 | 0.79 (0.64,0.98)  | 0.0337  | 0.61 (0.44,0.84)    | 0.0028  |
| exm175467        | APOB     | 2   | 21225281  | 1.37 (1.03,1.82)  | 0.0291  | 1.83 (1.16,2.9)     | 0.0096  |
| newrs676210      | APOB     | 2   | 21231524  | 1.38 (1.04,1.83)  | 0.0253  | 1.83 (1.16,2.9)     | 0.0096  |
| JHU_2.70774695   | TGFA     | 2   | 70774696  | 2.89 (1.05,7.92)  | 0.0398  | 12.68 (1.56,103.06) | 0.0175  |
| rs10932427       | ERBB4    | 2   | 213073615 | 0.66 (0.47,0.94)  | 0.0211  | 0.41 (0.21,0.8)     | 0.0088  |
| rs546530         | TRIP12   | 2   | 230752964 | 1.26 (1.01,1.57)  | 0.0436  | 1.38 (1.01,1.88)    | 0.0420  |
| rs7570061        | INPP5D   | 2   | 233977318 | 0.71 (0.55,0.92)  | 0.0091  | 0.66 (0.46,0.94)    | 0.0216  |
| rs79048756       | CD96     | 3   | 111323053 | 0.43 (0.23,0.81)  | 0.0091  | 0.35 (0.14,0.89)    | 0.0281  |
| rs61505577       | BMPR1B   | 4   | 95789665  | 2 (1.05,3.8)      | 0.0350  | 4.04 (1.55,10.56)   | 0.0044  |
| rs73836068       | BMPR1B   | 4   | 95891132  | 1.56 (1.01,2.42)  | 0.0456  | 3.1 (1.45,6.63)     | 0.0036  |
| JHU_6.117021274  | KPNA5    | 6   | 117021275 | 0.44 (0.24,0.82)  | 0.0103  | 0.31 (0.12,0.83)    | 0.0202  |
| 6:125369362-CT   | RNF217   | 6   | 125369362 | 0.28 (0.09,0.91)  | 0.0345  | 0.21 (0.05,0.96)    | 0.0439  |
| rs73783372       | PARK2    | 6   | 162155477 | 2.43 (1.31,4.51)  | 0.0050  | 2.72 (1.09,6.79)    | 0.0319  |
| JHU_7.54821275   | SEC61G   | 7   | 54821276  | 3.72 (1.18,11.76) | 0.0252  | 8.89 (1.03,76.48)   | 0.0466  |
| JHU_7.139540808  | TBXAS1   | 7   | 139540809 | 0.69 (0.48,1)     | 0.0482  | 0.54 (0.3,0.97)     | 0.0394  |
| JHU_8.71282810   | NCOA2    | 8   | 71282811  | 0.33 (0.11,0.94)  | 0.0382  | 0.08 (0.01,0.67)    | 0.0200  |
| rs4745646        | TJP2     | 9   | 71769323  | 1.49 (1.11,2.02)  | 0.0090  | 1.74 (1.1,2.74)     | 0.0174  |
| rs688391         | PRKCQ    | 10  | 6489652   | 1.3 (1.03,1.63)   | 0.0269  | 1.43 (1.02,2)       | 0.0381  |
| rs3793727        | PRKCQ    | 10  | 6508377   | 1.53 (1.18,1.99)  | 0.0014  | 1.56 (1.06,2.27)    | 0.0223  |
| rs658230         | PRKCQ    | 10  | 6508563   | 1.35 (1.08,1.69)  | 0.0093  | 1.46 (1.04,2.03)    | 0.0275  |
| JHU_10.32320560  | KIF5B    | 10  | 32320561  | 0.73 (0.55,0.97)  | 0.0323  | 0.63 (0.43,0.94)    | 0.0235  |
| rs12252698       | PRKG1    | 10  | 53608098  | 0.74 (0.55,1)     | 0.0490  | 0.6 (0.39,0.94)     | 0.0260  |
| rs1937701        | PRKG1    | 10  | 53608977  | 0.73 (0.57,0.95)  | 0.0168  | 0.68 (0.48,0.97)    | 0.0323  |
| JHU_10.75843193  | VCL      | 10  | 75843194  | 0.48 (0.24,0.93)  | 0.0301  | 0.37 (0.16,0.88)    | 0.0245  |
| JHU_10.93222022  | HECTD2   | 10  | 93222023  | 1.78 (1.01,3.14)  | 0.0457  | 2.5 (1.04,5.99)     | 0.0400  |
| rs3127255        | FBXW4    | 10  | 103370234 | 1.29 (1.01,1.65)  | 0.0434  | 1.49 (1.04,2.13)    | 0.0306  |
| rs666432         | TRIM29   | 11  | 120003533 | 1.41 (1.03,1.93)  | 0.0312  | 1.76 (1.05,2.96)    | 0.0323  |
| rs4411364        | TNFRSF19 | 13  | 24191374  | 1.38 (1.03,1.84)  | 0.0307  | 1.62 (1.02,2.58)    | 0.0423  |
| rs9510787        | TNFRSF19 | 13  | 24205195  | 1.38 (1.03,1.84)  | 0.0307  | 1.62 (1.02,2.58)    | 0.0423  |
| rs1630           | TNFRSF19 | 13  | 24249847  | 1.43 (1.13,1.82)  | 0.0033  | 1.61 (1.11,2.32)    | 0.0114  |
| rs17446928       | FOXO1    | 13  | 41212225  | 0.35 (0.2,0.6)    | 0.0002  | 0.46 (0.23,0.94)    | 0.0336  |
| rs76294435       | PPP2R5C  | 14  | 102274571 | 0.45 (0.25,0.8)   | 0.0063  | 0.3 (0.12,0.76)     | 0.0113  |
| JHU_14.103934653 | MARK3    | 14  | 103934654 | 0.75 (0.59,0.95)  | 0.0187  | 0.68 (0.48,0.96)    | 0.0268  |

|                 |        |    |           |                  |        |                  |        |
|-----------------|--------|----|-----------|------------------|--------|------------------|--------|
| rs55986634      | DAPK2  | 15 | 64275645  | 0.77 (0.6,1)     | 0.0496 | 0.62 (0.42,0.9)  | 0.0114 |
| rs2071501       | CSK    | 15 | 75095157  | 0.58 (0.35,0.95) | 0.0312 | 0.42 (0.23,0.78) | 0.0058 |
| JHU_16.4014963  | ADCY9  | 16 | 4014964   | 1.36 (1.05,1.78) | 0.0218 | 1.74 (1.18,2.55) | 0.0049 |
| rs933392        | ADCY9  | 16 | 4032716   | 1.44 (1.1,1.88)  | 0.0077 | 1.49 (1.01,2.19) | 0.0450 |
| exm1358199      | UBE2O  | 17 | 74387284  | 1.33 (1.05,1.69) | 0.0184 | 1.58 (1.09,2.3)  | 0.0158 |
| JHU_18.49961949 | DCC    | 18 | 49961950  | 0.7 (0.52,0.95)  | 0.0207 | 0.63 (0.4,1)     | 0.0497 |
| rs10414006      | SPTBN4 | 19 | 41001921  | 0.63 (0.47,0.83) | 0.0012 | 0.64 (0.42,0.98) | 0.0397 |
| rs11879349      | NLRP4  | 19 | 56364210  | 0.65 (0.45,0.92) | 0.0162 | 0.55 (0.34,0.88) | 0.0134 |
| exm2262720      | PAK3   | 23 | 110379807 | 0.72 (0.52,0.99) | 0.0443 | 0.57 (0.36,0.91) | 0.0192 |

\*Logistic models adjusted for age, gender, African ancestry score and pack years

**Supplemental Table 5.** Validated SNP-lung cancer associations among 1,762 lung cancer cases and controls without COPD

| Name            | Gene      | CHR | Position  | Discovery Sample |         | Validation Sample |         |
|-----------------|-----------|-----|-----------|------------------|---------|-------------------|---------|
|                 |           |     |           | OR* (95% CI)     | p value | OR* (95% CI)      | p value |
| exm69478        | ASB17     | 1   | 76397972  | 1.22 (1.01,1.47) | 0.0395  | 1.45 (1.11,1.9)   | 0.0070  |
| JHU_1.108497389 | VAV3      | 1   | 108497390 | 0.77 (0.59,0.99) | 0.0444  | 0.63 (0.44,0.92)  | 0.0170  |
| rs3754293       | LAMTOR2   | 1   | 156024373 | 0.83 (0.7,1)     | 0.0461  | 0.72 (0.55,0.93)  | 0.0136  |
| exm113346       | SPTA1     | 1   | 158645965 | 6.2 (1.7,22.6)   | 0.0057  | 6.69 (1.36,32.85) | 0.0192  |
| rs2230779       | TRAF5     | 1   | 211533352 | 1.5 (1.04,2.17)  | 0.0304  | 1.76 (1.05,2.95)  | 0.0332  |
| rs10929693      | ATP6V1C2  | 2   | 10863267  | 0.82 (0.69,0.98) | 0.0283  | 0.73 (0.56,0.96)  | 0.0240  |
| rs693           | APOB      | 2   | 21232195  | 0.82 (0.69,0.98) | 0.0299  | 0.76 (0.59,0.98)  | 0.0366  |
| rs3749096       | EDAR      | 2   | 109512428 | 1.3 (1.02,1.66)  | 0.0341  | 1.45 (1.03,2.02)  | 0.0307  |
| rs13418730      | WIPF1     | 2   | 175540594 | 0.71 (0.51,0.98) | 0.0392  | 0.62 (0.39,0.99)  | 0.0434  |
| rs7583875       | AP1S3     | 2   | 224665694 | 0.83 (0.7,0.98)  | 0.0273  | 0.76 (0.6,0.97)   | 0.0262  |
| rs115435003     | TRIP12    | 2   | 230629658 | 0.48 (0.25,0.93) | 0.0300  | 0.34 (0.12,0.96)  | 0.0408  |
| JHU_3.18396523  | SATB1     | 3   | 18396524  | 0.33 (0.17,0.65) | 0.0012  | 0.37 (0.14,0.97)  | 0.0429  |
| rs80069959      | KCNH8     | 3   | 19223049  | 0.6 (0.37,0.97)  | 0.0366  | 0.53 (0.29,0.98)  | 0.0431  |
| JHU_3.119275362 | CD80      | 3   | 119275363 | 0.56 (0.35,0.88) | 0.0115  | 0.48 (0.25,0.91)  | 0.0258  |
| rs953239        | TRPC1     | 3   | 142446205 | 1.2 (1.01,1.43)  | 0.0351  | 1.29 (1.02,1.63)  | 0.0359  |
| rs7623154       | PIK3CA    | 3   | 178921158 | 1.22 (1.01,1.48) | 0.0406  | 1.31 (1,1.72)     | 0.0490  |
| JHU_5.16912953  | MYO10     | 5   | 16912954  | 2.01 (1,4.02)    | 0.0486  | 2.82 (1.07,7.42)  | 0.0361  |
| JHU_5.35873123  | IL7R      | 5   | 35873124  | 0.64 (0.42,0.98) | 0.0382  | 0.52 (0.29,0.95)  | 0.0320  |
| rs7726469       | CAMK4     | 5   | 110586438 | 0.79 (0.64,0.96) | 0.0202  | 0.72 (0.53,0.96)  | 0.0248  |
| rs12153148      | KLHL3     | 5   | 136964764 | 0.74 (0.6,0.92)  | 0.0056  | 0.72 (0.53,0.98)  | 0.0374  |
| rs3777376       | KLHL3     | 5   | 136965249 | 0.75 (0.6,0.93)  | 0.0086  | 0.68 (0.49,0.94)  | 0.0206  |
| rs7774142       | LY86      | 6   | 6642058   | 1.27 (1.06,1.52) | 0.0106  | 1.33 (1.03,1.73)  | 0.0308  |
| exm-rs3827784   | LY86      | 6   | 6642405   | 1.28 (1.07,1.54) | 0.0075  | 1.34 (1.03,1.73)  | 0.0299  |
| JHU_6.137043810 | MAP3K5    | 6   | 137043811 | 1.97 (1,3.87)    | 0.0497  | 3.11 (1.03,9.32)  | 0.0433  |
| rs56247201      | PARK2     | 6   | 162702092 | 0.52 (0.31,0.85) | 0.0091  | 0.47 (0.24,0.91)  | 0.0259  |
| rs35537854      | RPS6KA2   | 6   | 167072030 | 0.64 (0.41,0.99) | 0.0445  | 0.56 (0.31,1)     | 0.0499  |
| JHU_7.30352063  | ZNRF2     | 7   | 30352064  | 0.19 (0.04,0.92) | 0.0396  | 0.11 (0.01,0.9)   | 0.0398  |
| JHU_7.30393775  | ZNRF2     | 7   | 30393776  | 0.37 (0.15,0.89) | 0.0263  | 0.17 (0.04,0.76)  | 0.0212  |
| exm689348       | TNFRSF10A | 8   | 23049292  | 0.78 (0.61,0.99) | 0.0413  | 0.69 (0.49,0.97)  | 0.0349  |
| rs73241640      | NRG1      | 8   | 31932616  | 0.46 (0.26,0.82) | 0.0081  | 0.24 (0.09,0.67)  | 0.0061  |
| rs11776203      | NRG1      | 8   | 32419119  | 0.79 (0.63,0.99) | 0.0410  | 0.71 (0.52,0.98)  | 0.0343  |
| JHU_8.32431713  | NRG1      | 8   | 32431714  | 0.47 (0.23,0.94) | 0.0317  | 0.35 (0.13,0.94)  | 0.0375  |
| rs1014306       | DAPK1     | 9   | 90157451  | 1.35 (1.12,1.61) | 0.0013  | 1.3 (1,1.69)      | 0.0495  |
| rs12378686      | DAPK1     | 9   | 90163570  | 1.28 (1.05,1.56) | 0.0149  | 1.35 (1.01,1.8)   | 0.0450  |

|                  |          |    |           |                  |        |                   |        |
|------------------|----------|----|-----------|------------------|--------|-------------------|--------|
| JHU_9.90198587   | DAPK1    | 9  | 90198588  | 0.6 (0.38,0.95)  | 0.0297 | 0.52 (0.29,0.91)  | 0.0226 |
| rs10995319       | PRKG1    | 10 | 52762887  | 1.27 (1.01,1.6)  | 0.0448 | 1.41 (1.01,1.97)  | 0.0466 |
| rs7904024        | PRKG1    | 10 | 52841790  | 1.26 (1.05,1.51) | 0.0109 | 1.32 (1.04,1.68)  | 0.0221 |
| JHU_10.83841723  | NRG3     | 10 | 83841724  | 2.27 (1.03,5.03) | 0.0432 | 10.12 (1.23,82.9) | 0.0310 |
| rs74153420       | BMPR1A   | 10 | 88628433  | 2.12 (1.01,4.44) | 0.0478 | 3.02 (1.14,8.01)  | 0.0265 |
| JHU_10.123313013 | FGFR2    | 10 | 123313014 | 1.36 (1.02,1.82) | 0.0375 | 1.94 (1.21,3.09)  | 0.0058 |
| rs548142         | DYNC2H1  | 11 | 103315520 | 0.73 (0.61,0.87) | 0.0006 | 0.77 (0.6,1)      | 0.0475 |
| JHU_12.6438144   | TNFRSF1A | 12 | 6438145   | 1.66 (1.09,2.53) | 0.0187 | 2.26 (1.24,4.1)   | 0.0076 |
| JHU_12.26512936  | ITPR2    | 12 | 26512937  | 2.95 (1.09,7.96) | 0.0329 | 4.89 (1,23.86)    | 0.0497 |
| rs61971164       | STK24    | 13 | 99190397  | 0.73 (0.58,0.92) | 0.0065 | 0.72 (0.52,0.99)  | 0.0433 |
| rs17565502       | TNFSF13B | 13 | 108954304 | 1.21 (1,1.47)    | 0.0462 | 1.35 (1.03,1.76)  | 0.0270 |
| JHU_14.23313974  | MMP14    | 14 | 23313975  | 0.59 (0.34,1)    | 0.0484 | 0.43 (0.21,0.88)  | 0.0207 |
| rs78656887       | PSMC1    | 14 | 90734095  | 0.58 (0.35,0.96) | 0.0347 | 0.24 (0.08,0.71)  | 0.0098 |
| rs12441042       | TLN2     | 15 | 62946064  | 0.82 (0.68,0.98) | 0.0265 | 0.75 (0.58,0.97)  | 0.0266 |
| rs75395345       | PIAS1    | 15 | 68373718  | 1.25 (1.03,1.52) | 0.0253 | 1.34 (1.02,1.77)  | 0.0363 |
| rs74318887       | MEF2A    | 15 | 100229061 | 0.47 (0.27,0.84) | 0.0107 | 0.44 (0.2,0.99)   | 0.0483 |
| rs76272325       | PSMB6    | 17 | 4699845   | 0.54 (0.34,0.85) | 0.0080 | 0.43 (0.21,0.88)  | 0.0209 |
| JHU_17.5413392   | NLRP1    | 17 | 5413393   | 0.82 (0.68,0.99) | 0.0388 | 0.74 (0.56,0.97)  | 0.0291 |
| JHU_17.40648111  | ATP6V0A1 | 17 | 40648112  | 1.82 (1.24,2.67) | 0.0024 | 1.8 (1.02,3.18)   | 0.0435 |
| rs12949223       | CD300LD  | 17 | 72589264  | 1.21 (1.01,1.46) | 0.0433 | 1.3 (1,1.69)      | 0.0495 |
| JHU_18.21773860  | OSBPL1A  | 18 | 21773861  | 2.78 (1.26,6.14) | 0.0117 | 2.73 (1.01,7.36)  | 0.0476 |
| rs11082490       | SIGLEC15 | 18 | 43412628  | 1.59 (1.27,2.01) | 0.0001 | 1.42 (1.03,1.94)  | 0.0297 |
| rs58993112       | MALT1    | 18 | 56412784  | 1.31 (1.04,1.66) | 0.0246 | 1.45 (1.03,2.05)  | 0.0336 |
| exm2253611       | PDE4A    | 19 | 10546771  | 1.23 (1.03,1.47) | 0.0204 | 1.3 (1,1.69)      | 0.0478 |
| rs9676881        | KEAP1    | 19 | 10596780  | 1.32 (1.11,1.58) | 0.0021 | 1.31 (1.01,1.71)  | 0.0413 |
| rs2898449        | MX1      | 21 | 42814495  | 0.72 (0.54,0.97) | 0.0331 | 0.62 (0.41,0.94)  | 0.0231 |

\*Logistic models adjusted for age, gender, African ancestry score and pack years

**Supplemental Table 6.** Histology-specific effects of validated, consistent context dependent SNPs in cases and controls with COPD.

| Name            | Gene     | Chr | Adenocarcinoma    |        | Squamous cell     |        |
|-----------------|----------|-----|-------------------|--------|-------------------|--------|
|                 |          |     | OR (95% CI)       | p-val  | OR (95% CI)       | p-val  |
| rs2901600       | DNM3     | 1   | 0.77 (0.63,0.95)  | 0.0158 | 0.66 (0.50,0.87)  | 0.0029 |
| JHU_2.70774695  | TGFA     | 2   | 4.99 (1.93,12.90) | 0.0009 | 5.63 (1.80,17.57) | 0.0029 |
| rs10932427      | ERBB4    | 2   | 0.59 (0.40,0.85)  | 0.0049 | 0.62 (0.39,0.98)  | 0.0422 |
| rs7570061       | INPP5D   | 2   | 0.70 (0.55,0.89)  | 0.0033 | 0.69 (0.50,0.94)  | 0.0190 |
| rs79048756      | CD96     | 3   | 0.53 (0.29,0.95)  | 0.0336 | 0.21 (0.07,0.62)  | 0.0051 |
| rs61505577      | BMPR1B   | 4   | 2.32 (1.30,4.16)  | 0.0046 | 2.88 (1.35,6.10)  | 0.0059 |
| JHU_6.117021274 | KPNA5    | 6   | 0.46 (0.25,0.85)  | 0.0127 | 0.46 (0.20,1.08)  | 0.0743 |
| 6:125369362-CT  | RNF217   | 6   | 0.30 (0.10,0.92)  | 0.0353 | 0.41 (0.11,1.54)  | 0.1860 |
| rs73783372      | PARK2    | 6   | 2.61 (1.48,4.61)  | 0.0009 | 2.40 (1.22,4.72)  | 0.0112 |
| JHU_8.71282810  | NCOA2    | 8   | 0.05 (0.01,0.47)  | 0.0088 | 0.58 (0.19,1.80)  | 0.3454 |
| rs4745646       | TJP2     | 9   | 1.58 (1.18,2.10)  | 0.0020 | 1.62 (1.13,2.31)  | 0.0081 |
| rs3793727       | PRKCQ    | 10  | 1.48 (1.17,1.89)  | 0.0013 | 1.54 (1.13,2.10)  | 0.0060 |
| rs658230        | PRKCQ    | 10  | 1.23 (1.00,1.53)  | 0.0543 | 1.47 (1.11,1.95)  | 0.0076 |
| rs12252698      | PRKG1    | 10  | 0.79 (0.59,1.05)  | 0.1041 | 0.60 (0.40,0.88)  | 0.0098 |
| rs1937701       | PRKG1    | 10  | 0.70 (0.55,0.90)  | 0.0046 | 0.58 (0.42,0.80)  | 0.0008 |
| JHU_10.75843193 | VCL      | 10  | 0.36 (0.18,0.71)  | 0.0030 | 0.60 (0.28,1.28)  | 0.1871 |
| rs666432        | TRIM29   | 11  | 1.60 (1.18,2.17)  | 0.0025 | 1.12 (0.75,1.69)  | 0.5681 |
| rs4411364       | TNFRSF19 | 13  | 1.40 (1.05,1.86)  | 0.0204 | 1.26 (0.87,1.83)  | 0.2129 |
| rs9510787       | TNFRSF19 | 13  | 1.40 (1.05,1.86)  | 0.0204 | 1.26 (0.87,1.83)  | 0.2129 |
| rs1630          | TNFRSF19 | 13  | 1.43 (1.13,1.80)  | 0.0026 | 1.61 (1.21,2.14)  | 0.0010 |
| rs17446928      | FOXO1    | 13  | 0.36 (0.21,0.63)  | 0.0003 | 0.52 (0.27,0.98)  | 0.0444 |
| rs2071501       | CSK      | 15  | 0.60 (0.38,0.94)  | 0.0255 | 0.38 (0.19,0.74)  | 0.0046 |
| JHU_16.4014963  | ADCY9    | 16  | 1.40 (1.09,1.79)  | 0.0079 | 1.53 (1.11,2.10)  | 0.0088 |
| rs933392        | ADCY9    | 16  | 1.28 (0.99,1.64)  | 0.0582 | 1.51 (1.10,2.08)  | 0.0118 |
| exm1358199      | UBE2O    | 17  | 1.24 (0.99,1.56)  | 0.0660 | 1.77 (1.32,2.38)  | 0.0001 |
| JHU_18.49961949 | DCC      | 18  | 0.72 (0.54,0.97)  | 0.0328 | 0.65 (0.44,0.96)  | 0.0302 |
| rs10414006      | SPTBN4   | 19  | 0.67 (0.51,0.88)  | 0.0040 | 0.59 (0.41,0.85)  | 0.0040 |
| rs11879349      | NLRP4    | 19  | 0.50 (0.35,0.71)  | 0.0001 | 0.72 (0.47,1.09)  | 0.1152 |
| exm2262720      | PAK3     | 23  | 0.75 (0.55,1.01)  | 0.0572 | 0.72 (0.49,1.04)  | 0.0766 |

**Supplemental Table 7.** Histology-specific effects of validated, consistent context dependent SNPs in cases and controls without COPD.

| Name             | Gene     | Chr | Adenocarcinoma    |        | Squamous cell     |        |
|------------------|----------|-----|-------------------|--------|-------------------|--------|
|                  |          |     | OR (95% CI)       | p-val  | OR (95% CI)       | p-val  |
| JHU_1.108497389  | VAV3     | 1   | 0.68 (0.53,0.87)  | 0.0026 | 0.84 (0.56,1.25)  | 0.3903 |
| exm113346        | SPTA1    | 1   | 6.75 (2.34,19.46) | 0.0004 | 9.72 (2.29,41.31) | 0.0021 |
| rs3749096        | EDAR     | 2   | 1.16 (0.92,1.46)  | 0.2146 | 1.62 (1.12,2.35)  | 0.0101 |
| rs13418730       | WIPF1    | 2   | 0.71 (0.52,0.96)  | 0.0270 | 0.35 (0.17,0.72)  | 0.0042 |
| JHU_3.119275362  | CD80     | 3   | 0.58 (0.38,0.90)  | 0.0136 | 0.36 (0.15,0.89)  | 0.0264 |
| rs953239         | TRPC1    | 3   | 1.14 (0.98,1.33)  | 0.0975 | 1.39 (1.05,1.83)  | 0.0212 |
| rs7623154        | PIK3CA   | 3   | 1.30 (1.08,1.55)  | 0.0045 | 1.30 (0.96,1.75)  | 0.0859 |
| JHU_5.16912953   | MYO10    | 5   | 2.47 (1.33,4.57)  | 0.0040 | 2.60 (1.05,6.45)  | 0.0394 |
| rs7726469        | CAMK4    | 5   | 0.78 (0.64,0.94)  | 0.0105 | 0.72 (0.52,1.00)  | 0.0476 |
| rs3777376        | KLHL3    | 5   | 0.83 (0.68,1.01)  | 0.0614 | 0.60 (0.41,0.89)  | 0.0103 |
| rs7774142        | LY86     | 6   | 1.25 (1.06,1.48)  | 0.0086 | 1.37 (1.02,1.83)  | 0.0347 |
| exm-rs3827784    | LY86     | 6   | 1.25 (1.06,1.48)  | 0.0088 | 1.35 (1.01,1.81)  | 0.0454 |
| JHU_6.137043810  | MAP3K5   | 6   | 2.15 (1.13,4.08)  | 0.0189 | 2.69 (1.09,6.64)  | 0.0315 |
| JHU_7.30352063   | ZNRF2    | 7   | 0.09 (0.01,0.72)  | 0.0224 | --                | --     |
| rs73241640       | NRG1     | 8   | 0.26 (0.13,0.52)  | 0.0001 | 0.78 (0.33,1.84)  | 0.5725 |
| rs11776203       | NRG1     | 8   | 0.74 (0.60,0.92)  | 0.0063 | 0.92 (0.64,1.32)  | 0.6435 |
| rs7904024        | PRKG1    | 10  | 1.30 (1.10,1.53)  | 0.0019 | 1.18 (0.89,1.58)  | 0.2503 |
| JHU_10.123313013 | FGFR2    | 10  | 1.59 (1.21,2.09)  | 0.0010 | 1.49 (0.96,2.30)  | 0.0742 |
| rs548142         | DYNC2H1  | 11  | 0.76 (0.64,0.90)  | 0.0014 | 0.73 (0.55,0.97)  | 0.0317 |
| JHU_12.6438144   | TNFRSF1A | 12  | 1.80 (1.23,2.63)  | 0.0024 | 1.55 (0.84,2.85)  | 0.1623 |
| JHU_12.26512936  | ITPR2    | 12  | 2.71 (1.06,6.93)  | 0.0369 | 1.77 (0.39,8.01)  | 0.4601 |
| JHU_14.23313974  | MMP14    | 14  | 0.61 (0.37,0.99)  | 0.0447 | 0.41 (0.17,1.00)  | 0.0501 |
| rs78656887       | PSMC1    | 14  | 0.60 (0.37,0.99)  | 0.0440 | 0.37 (0.14,1.01)  | 0.0524 |
| rs74318887       | MEF2A    | 15  | 0.48 (0.28,0.83)  | 0.0081 | 0.37 (0.14,1.00)  | 0.0511 |
| JHU_17.40648111  | ATP6V0A1 | 17  | 1.88 (1.32,2.67)  | 0.0005 | 1.57 (0.85,2.92)  | 0.1518 |
| rs11082490       | SIGLEC15 | 18  | 1.47 (1.20,1.81)  | 0.0003 | 1.81 (1.30,2.52)  | 0.0005 |
| exm2253611       | PDE4A    | 19  | 1.28 (1.08,1.51)  | 0.0037 | 1.25 (0.95,1.66)  | 0.1172 |
| rs9676881        | KEAP1    | 19  | 1.32 (1.12,1.56)  | 0.0009 | 1.24 (0.93,1.66)  | 0.1348 |
